# Supplementary material for: Temperature-induced modulation of mesopore size in hierarchically porous amorphous TiO2/ZrO2 beads for improved dye adsorption capacity
Source: Royal Society of Chemistry journal article supplement (doi:10.1039/c4ta06289b), 2015-01-01
Supplement: c4ta06289b1.pdf [file c4ta06289b1.pdf]

## Electronic Supplementary Information

### **Temperature-induced modulation of mesopore size in hierarchically porous amorphous TiO<sub>2</sub>/ZrO<sub>2</sub> beads for improved dye adsorption capacity**

**Maryline Chee Kimling,<sup>a</sup> Dehong Chen<sup>a</sup> and Rachel A. Caruso<sup>\*a,b</sup>**

<sup>a</sup>*Particulate Fluids Processing Centre, School of Chemistry, The University of Melbourne, Melbourne, Victoria 3010, Australia*

<sup>b</sup>*CSIRO, Manufacturing Flagship, Private Bag 33, Clayton South, Victoria 3169, Australia*

*\*To whom correspondence should be addressed. E-mail: [rcaruso@unimelb.edu.au](mailto:rcaruso@unimelb.edu.au)*

Electronic Supplementary Information pp. S1–S9 contains two tables (Tables S1 and S2) and eight figures (Figs. S1–S9).

**Table S1** Characteristics of critical point dried CaAlg template beads and non-calcined hybrid template/TiO<sub>2</sub>/ZrO<sub>2</sub> beads

| Sample                       | Total weight loss (%) <sup>a</sup> | Total weight loss (%) <sup>b</sup> | Inorganic loading (%) <sup>c</sup> | BET surface area (m <sup>2</sup> g <sup>-1</sup> ) | Pore size <sup>d</sup> (nm) (<30 nm) | $V_{\text{mesopore}}^e$ (cm <sup>3</sup> g <sup>-1</sup> ) (2–30 nm) | $V_{\text{meso-macropore}}^f$ (cm <sup>3</sup> g <sup>-1</sup> ) (30–300 nm) |
|------------------------------|------------------------------------|------------------------------------|------------------------------------|----------------------------------------------------|--------------------------------------|----------------------------------------------------------------------|------------------------------------------------------------------------------|
| <i>Template</i>              |                                    |                                    |                                    |                                                    |                                      |                                                                      |                                                                              |
| TBr <sup>g</sup>             | –                                  | –                                  | –                                  | 400 ± 1                                            | –                                    | 0.401                                                                | 0.732                                                                        |
| TB50                         | –                                  | –                                  | –                                  | 522 ± 1                                            | –                                    | 0.508                                                                | 1.376                                                                        |
| TB85                         | –                                  | –                                  | –                                  | 406 ± 1                                            | –                                    | 0.411                                                                | 0.773                                                                        |
| TBLN <sub>2</sub>            | –                                  | –                                  | –                                  | 377 ± 1                                            | –                                    | 0.458                                                                | 1.381                                                                        |
| <i>Non-calcined sample</i>   |                                    |                                    |                                    |                                                    |                                      |                                                                      |                                                                              |
| TiZr <sup>g</sup>            | 32.2                               | –                                  | 67.8                               | 335 ± 5                                            | <2                                   | 0.161                                                                | 0.129                                                                        |
| <i>Method A</i>              |                                    |                                    |                                    |                                                    |                                      |                                                                      |                                                                              |
| TiZr-TB50                    | 35.2                               | –                                  | 64.8                               | 339 ± 32                                           | <2                                   | 0.165                                                                | 0.138                                                                        |
| TiZr-TB85                    | 39.9                               | –                                  | 60.1                               | 285 ± 10                                           | <2                                   | 0.165                                                                | 0.121                                                                        |
| TiZr-TBLN <sub>2</sub>       | 19.9                               | –                                  | 80.1                               | 368 ± 2                                            | <2                                   | 0.124                                                                | 0.058                                                                        |
| <i>Method B</i>              |                                    |                                    |                                    |                                                    |                                      |                                                                      |                                                                              |
| TiZr-ST-100                  | 30.9                               | 10.8                               | 58.3                               | 359 ± 1                                            | <2                                   | 0.162                                                                | 0.255                                                                        |
| TiZr-ST-140                  | 23.9                               | 17.2                               | 58.9                               | 359 ± 2                                            | <2, 8.8 ± 0.1                        | 0.236                                                                | 0.296                                                                        |
| TiZr-ST-180                  | 19.4                               | 19.6                               | 61.0                               | 328 ± 2                                            | <2, 11.0 ± 0.1                       | 0.280                                                                | 0.300                                                                        |
| TiZr-ST-240                  | 12.6                               | 22.8                               | 64.6                               | 204 ± 1                                            | <3, 20.2 ± 0.6                       | 0.288                                                                | 0.352                                                                        |
| TiZr-ST-NH <sub>3</sub> -100 | 32.2                               | 10.2                               | 57.6                               | 351 ± 4                                            | <2                                   | 0.170                                                                | 0.157                                                                        |
| TiZr-ST-NH <sub>3</sub> -140 | 20.9                               | 17.5                               | 61.6                               | 365 ± 1                                            | <2, 9.6 ± 0.1                        | 0.269                                                                | 0.271                                                                        |
| TiZr-ST-NH <sub>3</sub> -180 | 17.2                               | 20.5                               | 62.3                               | 317 ± 1                                            | <2, 12.3 ± 0.1                       | 0.294                                                                | 0.301                                                                        |
| TiZr-ST-NH <sub>3</sub> -240 | 10.6                               | 24.0                               | 65.4                               | 194 ± 2                                            | <3, 21.0 ± 0.4                       | 0.284                                                                | 0.354                                                                        |

<sup>a</sup>Determined from TGA in the temperature range of 25–500 °C.

<sup>b</sup>Estimated from the difference between the weight of the dry beads before and after solvothermal treatment. Assuming that total weight loss incurred is only related to weight of organic decomposed during solvothermal treatment.

<sup>c</sup>Estimated from the following calculation: 100% – sum of weight loss incurred during solvothermal treatment and weight loss determined from TGA.

<sup>d</sup>Average mesopore size obtained from three separate measurements within a size range of 2–30 nm through BJH analysis of the N<sub>2</sub> adsorption branch.

<sup>e,f</sup>Obtained from BJH analysis of the N<sub>2</sub> adsorption branch within the specified mesopore/meso-macropore size range.

<sup>g</sup>Reference bead sample prepared using template beads conditioned at room temperature and in the absence of a solvothermal treatment.

**Table S2** Langmuir AO7 adsorption capacities and associated constants obtained for the corresponding non-solvothermally and solvothermally treated TiO<sub>2</sub>/ZrO<sub>2</sub> in the absence and presence of NH<sub>3</sub>

| Sample                       | $q_{\max}$ (mg g <sup>-1</sup> ) | $b$         | $R^2$ |
|------------------------------|----------------------------------|-------------|-------|
| TiZr-500                     | 40 ± 3                           | 0.20 ± 0.10 | 0.922 |
| TiZr-ST-100                  | 47 ± 2                           | 0.15 ± 0.04 | 0.976 |
| TiZr-ST-140                  | 74 ± 4                           | 0.17 ± 0.04 | 0.976 |
| TiZr-ST-180                  | 92 ± 4                           | 0.10 ± 0.02 | 0.983 |
| TiZr-ST-NH <sub>3</sub> -100 | 50 ± 3                           | 0.05 ± 0.02 | 0.968 |
| TiZr-ST-NH <sub>3</sub> -140 | 85 ± 6                           | 0.11 ± 0.04 | 0.964 |
| TiZr-ST-NH <sub>3</sub> -180 | 101 ± 5                          | 0.12 ± 0.03 | 0.978 |

[AO7]<sub>initial</sub> = 25–300 ppm, pH = 2.01, [beads] = 1 g L<sup>-1</sup>.

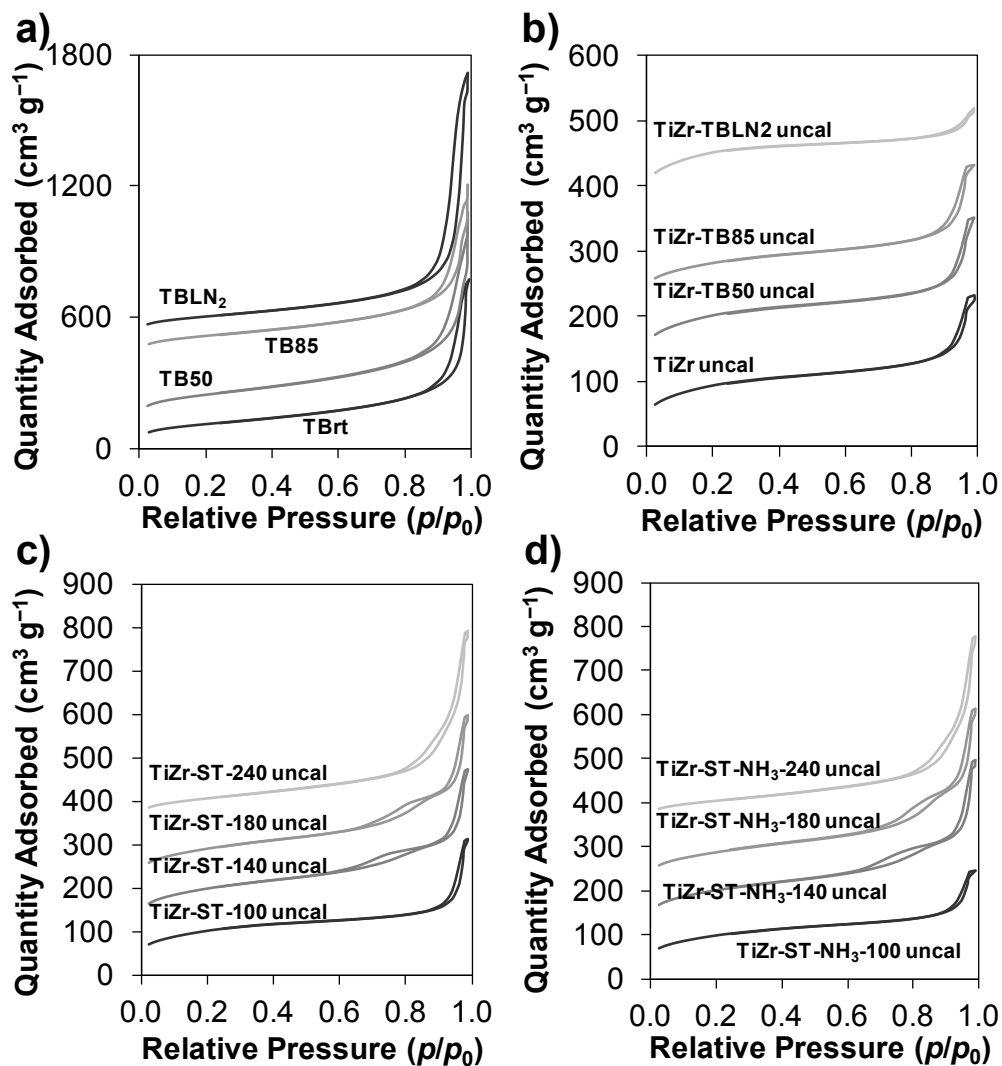

**Fig. S1.** (a)  $N_2$  sorption isotherms of critical point dried CaAlg beads conditioned at room temperature (TBrT), 50 °C (TB50), 85 °C (TB85), and -196 °C (liquid  $N_2$ ; TBLN<sub>2</sub>); for clarity, isotherms are offset by +0, +100, +400, and +500, respectively, along the  $y$ -axis.  $N_2$  sorption isotherms of non-calcined hybrid template/ $TiO_2/ZrO_2$  beads prepared from (b) Method A, using template beads conditioned at varying temperatures (including room temperature – TiZr uncal); and (c,d) Method B (solvothermal treatment) in the absence and presence of  $NH_3$ , respectively, at varying temperatures; for clarity, all isotherms are offset in the order from bottom to top by +0, +100, +200, and +350 along the  $y$ -axis.

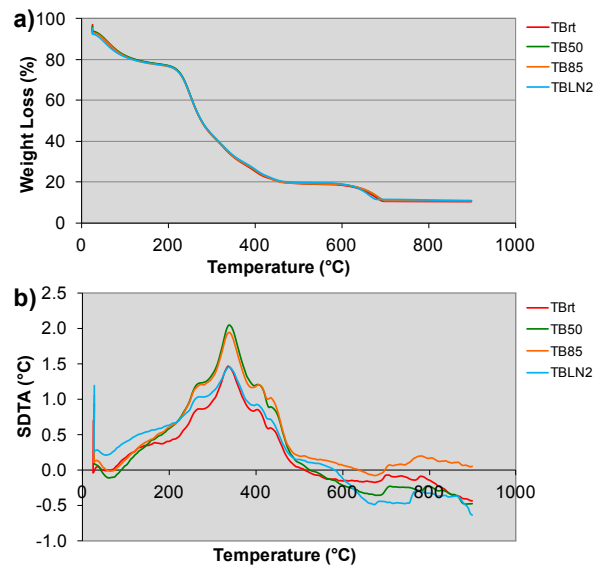

**Fig. S2.** (a) Thermograms and (b) single differential temperature (SDTA) profiles of critical point dried CaAlg template beads conditioned at room temperature (TBrt), 50 °C (TB50), 85 °C (TB85), and -196 °C (liquid N<sub>2</sub>; TBLN<sub>2</sub>).

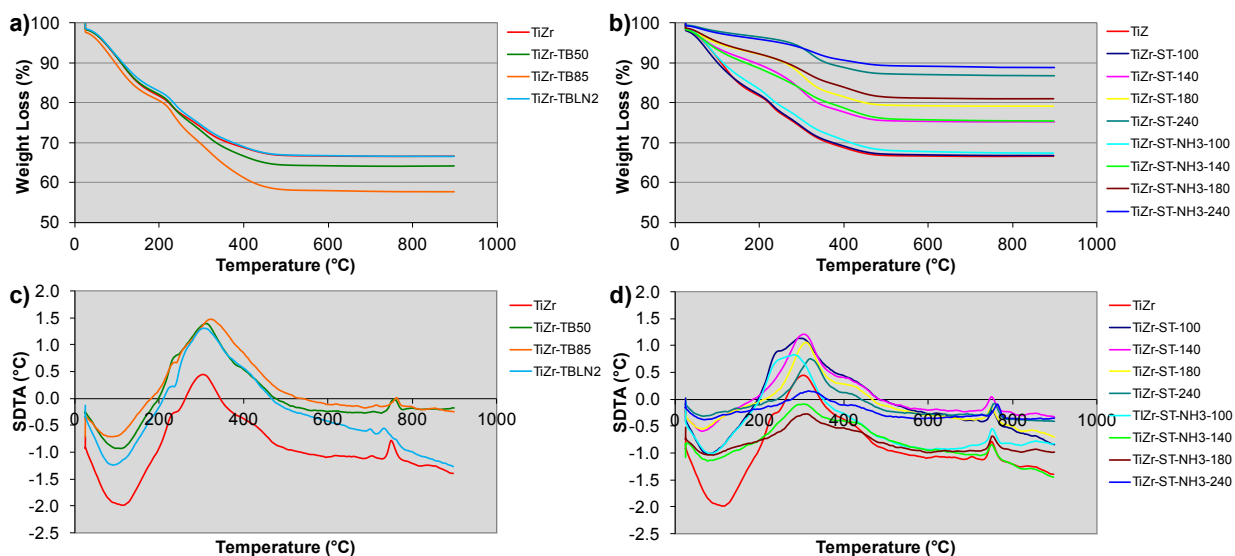

**Fig. S3.** Thermograms of non-calcined hybrid template/TiO<sub>2</sub>/ZrO<sub>2</sub> beads produced from (a) Method A, using template beads conditioned at varying temperatures (including room temperature – TiZr); and (b) Method B (solvothormal treatment) in the absence and presence of NH<sub>3</sub> at varying temperatures. Single differential temperature (SDTA) profiles of non-calcined hybrid template/TiO<sub>2</sub>/ZrO<sub>2</sub> beads produced from (c) Method A and (d) Method B.

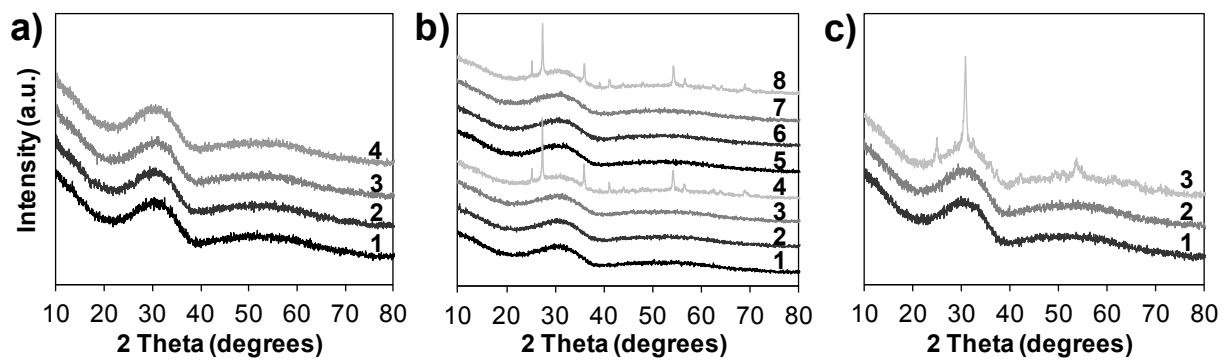

**Fig. S4.** XRD patterns of  $\text{TiO}_2/\text{ZrO}_2$  beads produced from (a) Method A: template beads conditioned at (1) room temperature, (2) 50, (3) 85, and (4)  $-196^\circ\text{C}$ ; (b) Method B: hybrid beads subjected to solvothermal treatment in the absence of  $\text{NH}_3$  at (1) 100, (2) 140, (3) 180, and (4)  $240^\circ\text{C}$ , and in the presence of  $\text{NH}_3$  at (5) 100, (6) 140, (7) 180, and (8)  $240^\circ\text{C}$ ; and (c) Method C: hybrid beads calcined at varying temperatures of (1) 500, (2) 600, and (3)  $700^\circ\text{C}$ .

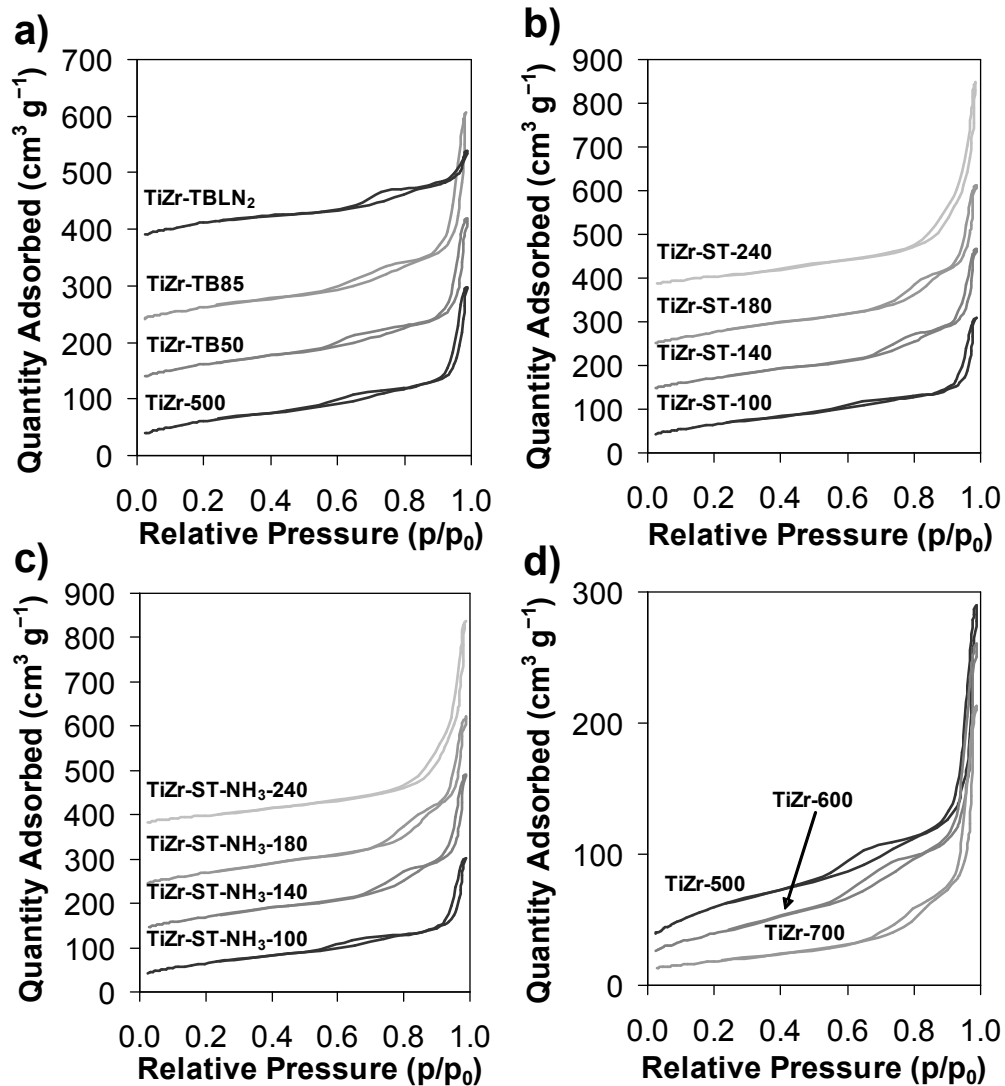

**Fig. S5.**  $N_2$  sorption isotherms of  $TiO_2/ZrO_2$  beads produced from (a) Method A, using template beads conditioned at varying temperatures (including room temperature – TiZr-500); (b,c) Method B (solvothelmal treatment) in the absence and presence of  $NH_3$ , respectively, at varying temperatures; and (d) Method C, at varying calcination temperatures. For clarity, all isotherms are offset in the order from bottom to top by +0, +100, +200, and +350 along the  $y$ -axis except for the isotherms in (d) where no offset holds.

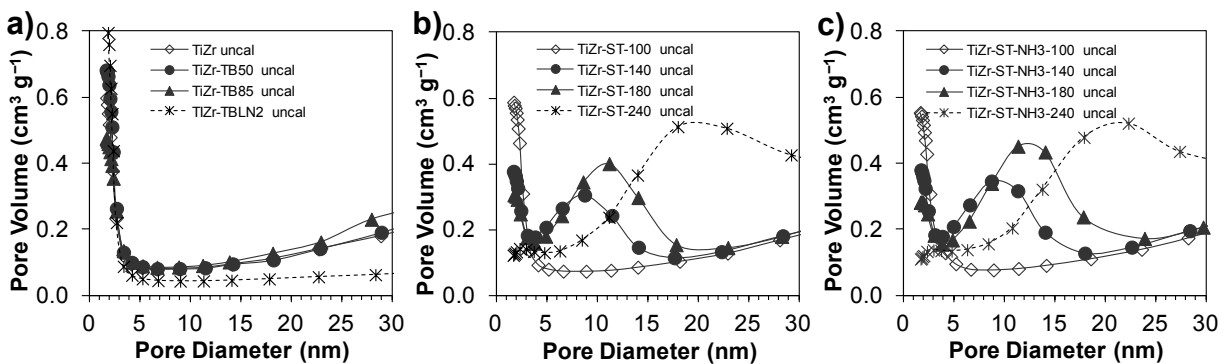

**Fig. S6.** Pore size distributions (<30 nm) determined from BJH analysis of the  $N_2$  adsorption branch on non-calcined hybrid template/ $TiO_2/ZrO_2$  beads prepared from (a) Method A, using template beads conditioned at varying temperatures (including room temperature – TiZr uncal); and (b,c) Method B in the absence and presence of  $NH_3$ , respectively, at varying temperatures.

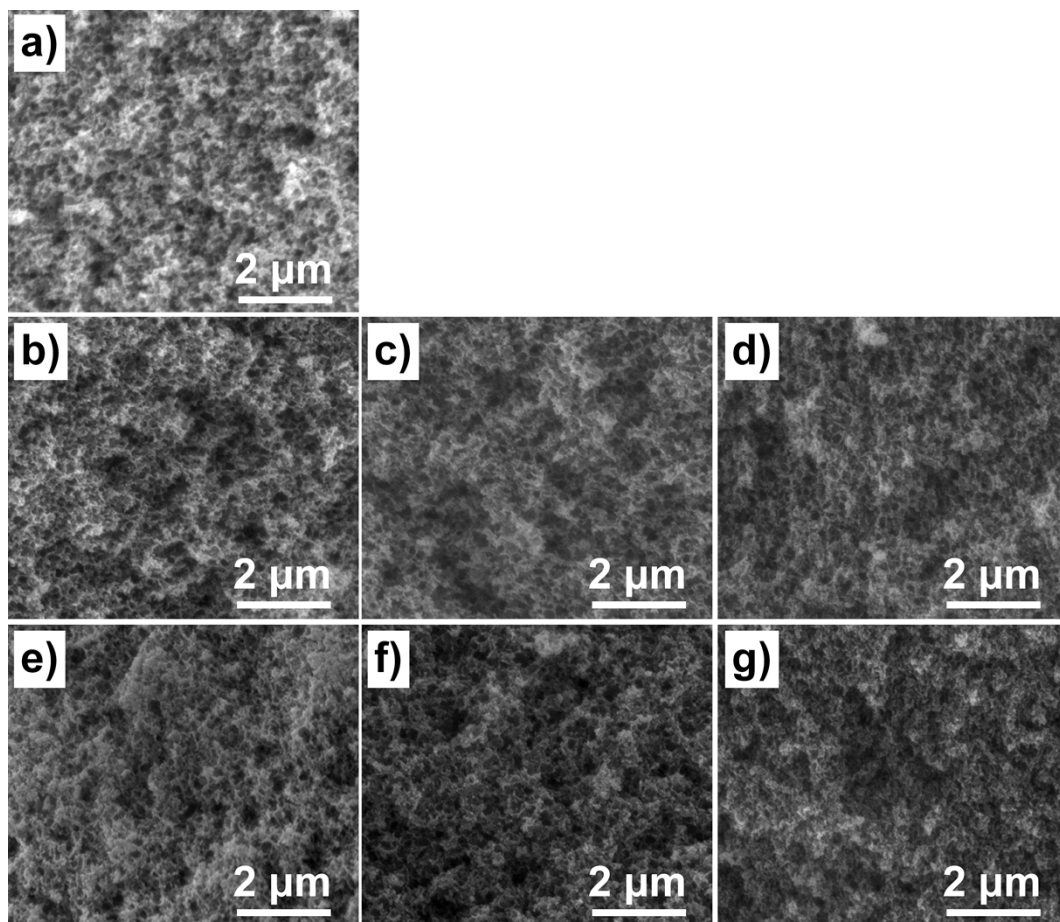

**Fig. S7.** Low-magnification SEM images of (a) non-solvothermally treated sample (TiZr-500) and solvothermally treated  $TiO_2/ZrO_2$  beads in the absence of  $NH_3$  at (b) 100, (c) 140, and (d) 180 °C, and presence of  $NH_3$  at (e) 100, (f) 140, and (g) 180 °C.



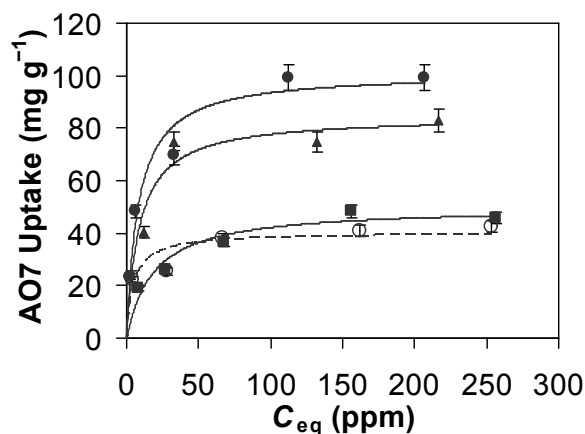

**Fig. S8.** AO7 uptake adsorption isotherms of (○) non-solvothermally treated sample (TiZr-500) and solvothermally treated samples in the presence of NH<sub>3</sub> at (●) 100, (■) 140, and (△) 180 °C. The broken and solid lines correspond to Langmuir fits for the four respective samples. [AO7]<sub>initial</sub> = 25–300 ppm, pH 2.01, [beads] = 1 g L<sup>-1</sup>.

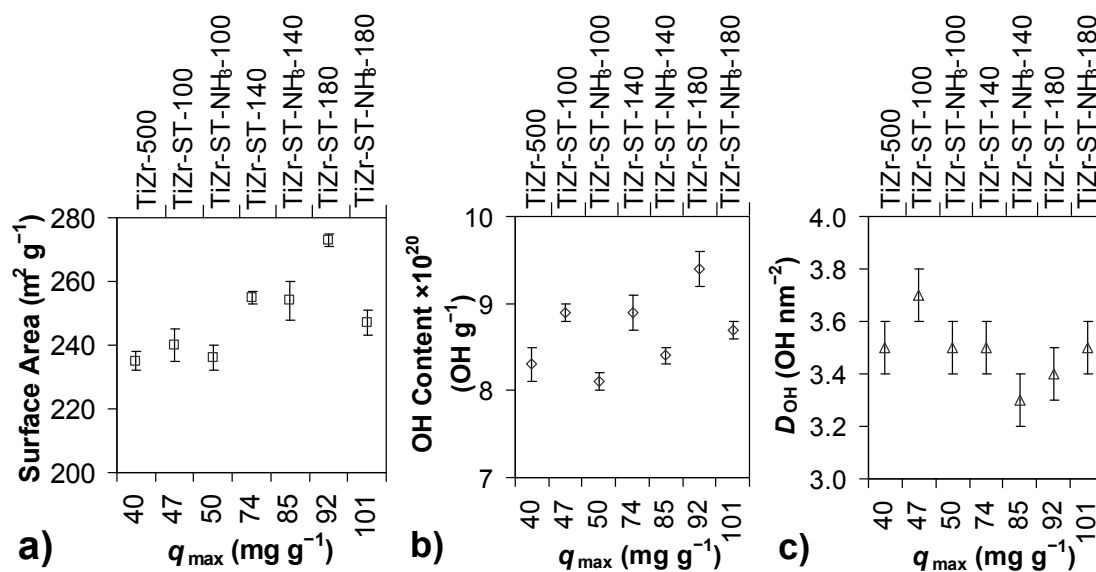

**Fig. S9.** Dependency of (a) surface area, (b) hydroxyl content (OH g<sup>-1</sup>), and (c) hydroxyl density ( $D_{OH}$ ) on AO7 adsorption capacity ( $q_{max}$ ) obtained for the non-solvothermally treated sample (TiZr-500) and solvothermally treated samples at varying temperatures in the absence and presence of NH<sub>3</sub>.
